# Supplementary material for: The Evolution of Dogs “smile”: Breed-specific Variations in the Relaxed Open Mouth Signal
Source: Research Square preprint supplement (doi:10.21203/rs.3.rs-6219576/v1), 2025-04-01
Supplement: Supplementary file 1 [file 002fbae91765b08c353b20b5.docx]

Akita:

1. <https://www.youtube.com/watch?v=0-ZRw0Ezc1Q>
2. <https://www.youtube.com/watch?v=kEu8bC7GoHw>
3. <https://www.youtube.com/watch?v=UOsb9SGc3DQ>
4. <https://www.youtube.com/shorts/E8o8xvZjzns>
5. <https://www.youtube.com/watch?v=siglUqee3-8>
6. <https://www.youtube.com/watch?v=3AzCm2OVZKU>
7. <https://www.youtube.com/watch?v=jPqF6C5KMm0>
8. <https://www.youtube.com/watch?v=mD4NTB85feE>

Shiba:

1. <https://www.youtube.com/watch?v=g63609sB9Pc>
2. <https://www.youtube.com/shorts/2r1mCipPC_s>
3. <https://www.youtube.com/watch?v=pfx60h5TZKA>
4. <https://www.youtube.com/watch?v=EnezbeFPrEo>

Australian Shepherd:

1. <https://www.youtube.com/watch?v=gwvUCukHzMU>
2. <https://www.youtube.com/watch?v=AyDTqVVAWvs>
3. <https://www.youtube.com/watch?v=oDR5GYEMus0>
4. <https://www.youtube.com/watch?v=8s7-eaNQQhU>
5. <https://www.youtube.com/watch?v=dyP52Rr-AGs>
6. <https://www.youtube.com/watch?v=A_Qft3iojKA>
7. <https://www.youtube.com/watch?v=eHlXCvYJcHo>
8. <https://www.youtube.com/watch?v=-rCXhJrKMOQ>

Beagle:

1. <https://www.youtube.com/watch?v=CSWN9u4iqL8>
2. <https://www.youtube.com/watch?v=nmnaI3TGtBo>
3. <https://www.youtube.com/watch?v=08zlOyKfXzY>
4. <https://www.youtube.com/watch?v=DuaVKiD14oA>
5. <https://www.youtube.com/watch?v=tAGwOeIcGso>

Border Collie:

1. <https://www.youtube.com/watch?v=ZQbHLr5BB-Q>
2. <https://www.youtube.com/watch?v=5HgBKo1XGfo>
3. <https://www.youtube.com/watch?v=HrgJsujT2Xg>
4. <https://www.youtube.com/watch?v=Xx_Toq2D6u4>
5. <https://www.youtube.com/watch?v=jWZ1efu3ehk>

Borzoi:

1. <https://www.youtube.com/watch?v=V6glucJpgVA>
2. <https://www.youtube.com/watch?v=Zg_ZsWyRGVo>
3. <https://www.youtube.com/watch?v=svl0K9hb55k>
4. <https://www.youtube.com/watch?v=iZWuVniFYHY>
5. <https://www.youtube.com/watch?v=Ox_raZQIJ2c>
6. <https://www.youtube.com/watch?v=p1viSagpKYY>

Pug:

1. <https://www.youtube.com/watch?v=W4hVWJilPxo>
2. <https://www.youtube.com/watch?v=qvhtl6nYH_U>
3. <https://www.youtube.com/watch?v=fI3I2_th63I>
4. <https://www.youtube.com/watch?v=alZ2LKyexgw>
5. <https://www.youtube.com/watch?v=dC2X3aoBtUQ>

Corgie:

1. <https://www.youtube.com/watch?v=S0fOs3luhqc>
2. <https://www.youtube.com/watch?v=qr0mrdIi9Lw>
3. <https://www.youtube.com/watch?v=8GVbqoPYK4A>
4. <https://www.youtube.com/watch?v=XHCgBGCUoy4>
5. <https://www.youtube.com/shorts/GO1rbJgBkgU>
6. <https://www.youtube.com/watch?v=ZeREA9xjcWQ>
7. <https://www.youtube.com/shorts/0W1zHlDrT7o>
8. <https://www.youtube.com/watch?v=Ve_CvQNm6sI>

Dobermann:

1. <https://www.youtube.com/shorts/kNSoXGbjW2Y>
2. <https://www.youtube.com/watch?v=6JmrHr4rQ-4>
3. <https://www.youtube.com/watch?v=Ly1B_zYC79s>
4. <https://www.youtube.com/watch?v=uTBXSp5ALzM>

English Bulldog

1. <https://www.youtube.com/watch?v=9a5S61Cp4ok>
2. <https://www.youtube.com/watch?v=5XmI6nqqhqo>
3. <https://www.youtube.com/watch?v=p4gnkwyveqc> (NO ROM)
4. <https://www.youtube.com/watch?v=ox0OBCjIZ2Q>

French Bulldog:

1. https://www.youtube.com/watch?v=BTQybIXwzlo
2. <https://www.youtube.com/watch?v=Trii51HwcoM>
3. <https://www.youtube.com/watch?v=kmnO6CUNGiA>

Boxer:

1. <https://www.youtube.com/watch?v=ieJJq4WksGg>
2. <https://www.youtube.com/watch?v=VM5jxIQMHqA>
3. <https://www.youtube.com/watch?v=sbDMeI-DvMk>
4. <https://www.youtube.com/watch?v=VM5jxIQMHqA>
5. <https://www.youtube.com/watch?v=ugChaIlPS_E>
6. <https://www.youtube.com/watch?v=aJNKbMxDOUA>

Pitbull:

1. <https://www.youtube.com/watch?v=tnLPQiucuc8>
2. <https://www.youtube.com/watch?v=bPbHjTKs524&pp=ugMICgJpdBABGAE%3D>
3. <https://www.youtube.com/watch?v=ZiJEahfSNJA>
4. <https://www.youtube.com/watch?v=K9uXYDhXBqY>
5. <https://www.youtube.com/watch?v=nvF2Cg7X4ys>
6. <https://www.youtube.com/watch?v=IgFRFovCvvg>
7. <https://www.youtube.com/watch?v=U4T-qGjy9u8>

Weimaraner:

1. <https://www.youtube.com/watch?v=8eYssppXSHk>
2. <https://www.youtube.com/watch?v=HmY-Z3X6v0c>
3. <https://www.youtube.com/watch?v=NcIfjhgWBak>
4. <https://www.youtube.com/watch?v=LFit5RxlQqE>
5. <https://www.youtube.com/watch?v=aMZGqXNmnyA>
6. https://www.youtube.com/watch?v=KwvhLwPwnSg

Siberian Husky:

1. <https://www.youtube.com/watch?v=EzHBR3eZf_4>
2. <https://www.youtube.com/watch?v=Ivy61qgn3Ag>
3. <https://www.youtube.com/watch?v=AKUhCbxY4bs>
4. <https://www.youtube.com/watch?v=mpuBvo501gY>
5. <https://www.youtube.com/shorts/OnUHvQ1OBu0>
6. <https://www.youtube.com/watch?v=RASC9oPIIYE>

Greyhounds:

1. <https://www.youtube.com/watch?v=hM0COWglEBk>
2. <https://www.youtube.com/watch?v=-cOdoLxmb_k>
3. [https://www.youtube.com/watch?v=Eu x6FAcgHjk](https://www.youtube.com/watch?v=Eu%20%20x6FAcgHjk)
4. <https://www.youtube.com/watch?v=oS69LCwqNZs>
5. <https://www.youtube.com/watch?v=aXZwA2GZC2w>
6. <https://www.youtube.com/watch?v=b1K2u7uvfrQ>

Poodles:

1. <https://www.youtube.com/watch?v=jGAEnX2W_sE>
2. <https://www.youtube.com/watch?v=XITlXKfF6AQ>
3. <https://www.youtube.com/watch?v=K6T2i97petQ>
4. <https://www.youtube.com/watch?v=De8uKKGUxTM>
5. <https://www.youtube.com/watch?v=Rt0ULB-XEFw>

German Shepherd:

1. <https://www.youtube.com/watch?v=0EoLBfKjBQc>
2. <https://www.youtube.com/watch?v=2kWupMxAmDA>
3. <https://www.youtube.com/watch?v=y_F_zwXezfQ>
4. <https://www.youtube.com/watch?v=6iNGwJMflVE>
5. <https://www.youtube.com/watch?v=SJwAlkos3Fo>
6. https://www.youtube.com/watch?v=5VAGJtlvpxc

Jack russell:

1. <https://www.youtube.com/watch?v=R4s2xDTHU8M>
2. <https://www.youtube.com/watch?v=ZbmVjVFZ9tU>
3. <https://www.youtube.com/watch?v=VelX9PqWd4A>
4. <https://www.youtube.com/watch?v=5K7xY0yWHOw>
5. <https://www.youtube.com/shorts/N4W-mRlltxo>

Cocker:

1. <https://www.youtube.com/watch?v=MxqL5yKVoWQ>
2. <https://www.youtube.com/watch?v=8bUq67lqmuI>
3. <https://www.youtube.com/watch?v=Z0c3_5eouI8>
4. <https://www.youtube.com/watch?v=nfsQb8AbFUk>
5. <https://www.youtube.com/watch?v=qjItUXzXGGk>

Basset:

1. <https://www.youtube.com/watch?v=wRFCcobgBzA>
2. <https://www.youtube.com/watch?v=QxhA5MKUCNU>
3. <https://www.youtube.com/watch?v=WfZ3vRJpadA>
4. <https://www.youtube.com/watch?v=Ys-_CxpnPeg>
5. <https://www.youtube.com/watch?v=KmqBgYfVvlU>

Rottweiler:

1. <https://www.youtube.com/watch?v=KkKPGHutt38>
2. <https://www.youtube.com/watch?v=evgyx3A3zrI>
3. <https://www.youtube.com/watch?v=yUyCnruwtNM>
4. <https://www.youtube.com/watch?v=r-T_Wmms-Lo>
5. <https://www.youtube.com/watch?v=lW_UIaYI7bk>
6. <https://www.youtube.com/shorts/JEis61Ggv5k>

Shihtzu:

1. <https://www.youtube.com/watch?v=b-HQ90BgLNI>
2. <https://www.youtube.com/watch?v=Pm1X_LtdtIo>
3. <https://www.youtube.com/watch?v=nmiMOJ5uVSY>
4. <https://www.youtube.com/watch?v=u4zabjmXAZU>
5. <https://www.youtube.com/watch?v=Sb8_PcSsawk>

Bull terrier:

1. <https://www.youtube.com/watch?v=OFBQogwEhkw>
2. <https://www.youtube.com/watch?v=UnDVC40HCJU>
3. <https://www.youtube.com/watch?v=99Glv35KKB8>
4. <https://www.youtube.com/watch?v=HgXbwmeLdwQ>

Shar pei:

1. <https://www.youtube.com/watch?v=AV5RAmKQH8A>
2. <https://www.youtube.com/watch?v=X5IKGK8OPXU>
3. <https://www.youtube.com/watch?v=Fy9Y3Dwy6II>
4. <https://www.youtube.com/watch?v=9ei3ZlMnyag&list=RDCMUCo6II6uVFbCtii_egdGhO1w&index=12>

Newfoundland dog

1. <https://www.youtube.com/watch?v=XbnuVxecdjY> (NO ROM)
2. <https://www.youtube.com/watch?v=uyIgtytZhbc>
3. <https://www.youtube.com/watch?v=iO_4AyDn19Q> (CUCCIOLI)
4. <https://www.youtube.com/watch?v=79UqIyGAafg> (con un cucciolo)
5. <https://www.youtube.com/watch?v=-s4AxTkYBI4>
6. <https://www.youtube.com/watch?v=Tzjj1ymuQyw> (NO ROM)

Chihuaha

1. <https://www.youtube.com/watch?v=1JG0zKO5pJE>
2. <https://www.youtube.com/watch?v=xYLyRv52eog>
3. <https://www.youtube.com/watch?v=GhBM5i8qIPI&pp=ygUWY2hpaHVhaGEgcGxheSBmaWdodGluZw%3D%3D>
4. https://www.youtube.com/watch?v=2IGLmWrLFpg
