# Supplementary material for: The Evolution of Dogs “smile”: Breed-specific Variations in the Relaxed Open Mouth Signal
Source: Research Square preprint supplement (doi:10.21203/rs.3.rs-6219576/v1), 2025-04-01
Supplement: Supplementary file 2 [file 9624cbcd868a8162efc2f15a.xlsx]

## Sheet: Foglio1
Razza	AU_String
Akita	AU112+AU116+AU2527
Australian Shepherd	AU101+AU110+AU116+AU2527
Basset Hound	AU101+AU109+AU112+AU116+AU2527
Beagle	AU116+AU2527
Border Collie	AU109+AU112+AU116+AU2527
Borzoi	AU101+AU112+AU116+AU2527
Boxer	AU101+AU109+AU116+AU2527
Bull Terrier	AU109+AU116+AU2527
Chihuahua	AU101+AU109+AU116+AU2527
Cocker	AU101+AU112+AU116+AU2527
Corgie	AU101+AU109+AU116+AU2527
Czechoslovakian Wolfdog	AU101+AU109+AU110+AU112+AU116+AU2527
Dobermann	AU101+AU109+AU116+AU2527
English Bulldog	AU101+AU109+AU116+AU2527
French Bulldog	AU101+AU109+AU116+AU2527
German Shepherd	AU101+AU109+AU112+AU116+AU2527
Greyhound	AU101+AU109+AU116+AU2527
Jack Russell	AU101+AU116+AU2527
Labrador Retriever	AU101+AU112+AU116+AU2527
Newfoundland	AU101+AU109+AU116+AU2527
Pitbull	AU101+AU109+AU112+AU116+AU2527
Poodles	AU101+AU109+AU112+AU116+AU2527
Pug	AU101+AU109+AU2527
Rottweiler	AU101+AU109+AU112+AU116+AU2527
Sharpei	AU101+AU116+AU2527
Shiba	AU110+AU112+AU116+AU2527
Shih Tzu	AU101+AU109+AU112+AU2527
Siberian Husky	AU101+AU112+AU116+AU2527
Springer Spaniel	AU101+AU109+AU110+AU116+AU2527
Weimaraner	AU101+AU109+AU116+AU2527
Wild wolf	AU101+AU109+AU112+AU116+AU2527

## Sheet: Foglio2
Akita				AU112+	AU116+	AU 527
Australian Shepherd	AU101+		AU110+		AU116+	AU 527
Basset Hound	AU101+	AU109+		AU112+	AU116+	AU 527
Beagle					AU116+	AU 527
Border Collie		AU109+		AU112+	AU116+	AU 527
Borzoi	AU101+			AU112+	AU116+	AU 527
Boxer	AU101+	AU109+			AU116+	AU 527
Bull Terrier		AU109+				AU 527
Pug	AU101+	AU109+				AU 527
Chihuahua	AU101+	AU109+			AU116+	AU 527
Corgie	AU101+	AU109+			AU116+	AU 527
Dobermann	AU101+	AU109+			AU116+	AU 527
English Bulldog	AU101+	AU109+			AU116+	AU 527
French Bulldog	AU101+	AU109+			AU116+	AU 527
German Shepherd	AU101+	AU109+		AU112+	AU116+	AU 527
Greyhound	AU101+	AU109+			AU116+	AU 527
Jack Russell	AU101+				AU116+	AU 527
Newfoundland	AU101+	AU109+			AU116+	AU 527
Pitbull	AU101+	AU109+		AU112+	AU116+	AU 527
Poodles	AU101+	AU109+		AU112+	AU116+	AU 527
Rottweiler	AU101+	AU109+		AU112+	AU116+	AU 527
Sharpei	AU101+				AU116+	AU 527
Shiba			AU110+	AU112+	AU116+	AU 527
Shih Tzu	AU101+	AU109+		AU112+		AU 527
Siberian Husky	AU101+			AU112+	AU116+	AU 527
Springer Spaniel	AU101+	AU109+	AU110+		AU116+	AU 527
Weimaraner	AU101+	AU109+			AU116+	AU 527
Czechoslovakian Wolfdog	AU101+	AU109+	AU110+	AU112+	AU116+	AU 527
Wild wolf	AU101+	AU109+	AU110+	AU112+	AU116+	AU 527
